# Supplementary material for: The cascade of care following community-based detection of HIV in sub-Saharan Africa – A systematic review with 90-90-90 targets in sight
Source: PubMed Central journal article supplement (PMC6063407; doi:10.1371/journal.pone.0200737), 2018-07-27
Supplement: pone.0200737.s002.pdf [file pone.0200737.s002.pdf]

**Supplementary Figure-2: Template of standard indicators for reporting observed cascade of care data following community-based HTS (excludes “time-to-event” estimates)**

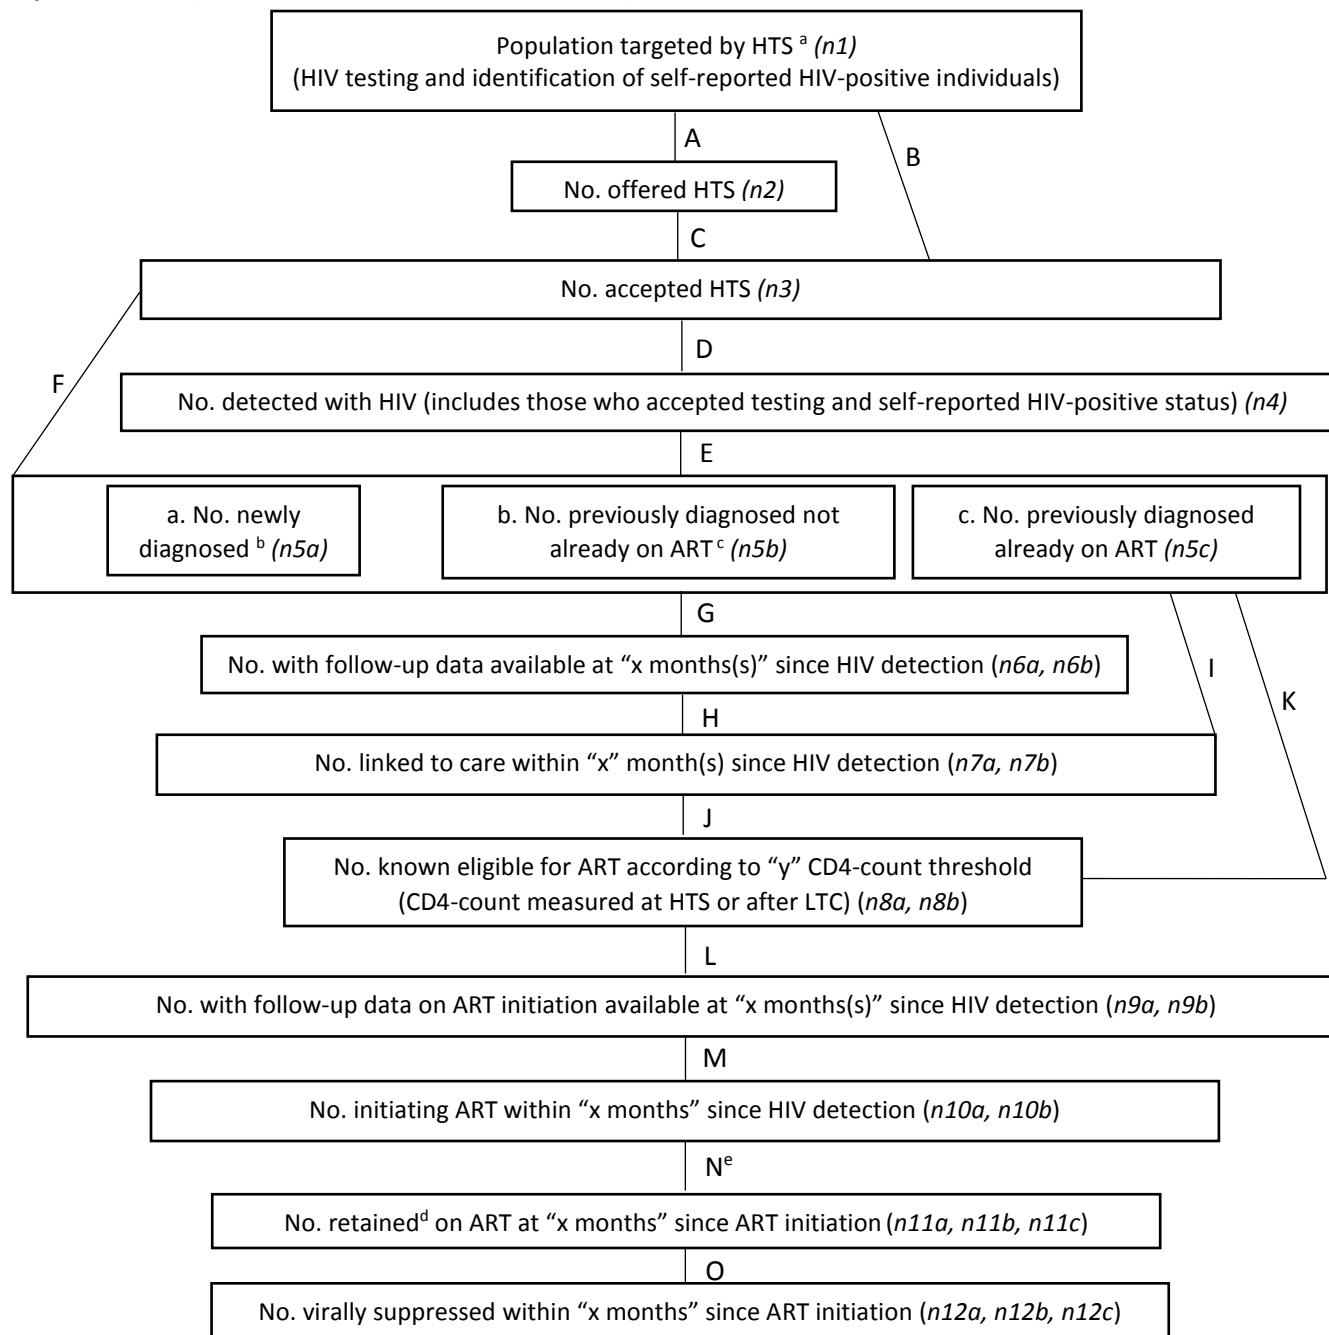

- A. Proportion of target population offered HTS ( $n2/n1$ )
- B. Population coverage of HTS ( $n3/n1$ )
- C. Proportion accepted HTS among offered ( $n3/n2$ )
- D. HIV-positivity in population accepting HTS ( $n4/n3$ )
- E. Proportion of each HIV+ve sub-group (a. newly diagnosed; b. previously diagnosed not on ART; c. previously diagnosed already on ART) among those detected by HTS ( $n5a/n4$ ;  $n5b/n4$ ;  $n5c/n4$ )
- F. Proportion of HIV+ve sub-group among those who accepted HTS ( $n5a/n3$ ;  $n5b/n3$ ;  $n5c/n3$ )
- G. Proportion with follow-up data among respective sub-groups, at one or more of 1m / 3m / 6m / 12m (from when individual received HTS) <sup>e</sup> ( $n6a/n5a$ ;  $n6b/n5b$ )
- H. Proportion linked to care among those with follow-up data by respective sub-groups, at one or more of 1m / 3m / 6m / 12m ( $n7a/n6a$ ;  $n7b/n6b$ )
- I. Proportion known linked to care among all those detected with HIV by respective sub-groups, at one or more of 1m / 3m / 6m / 12m ( $n7a/n5a$  &  $n7b/n5b$ )
- J. Proportion identified as eligible for ART initiation (100% if universal treatment applies) among those LTC by respective sub-groups, at one or more of 1m / 3m / 6m / 12m ( $n8a/n7a$  &  $n8b/n7b$ )
- K. Proportion identified as eligible for ART initiation (100% if universal treatment applies) among those who accepted HTS by respective sub-groups, at time of detection ( $n8a/n5a$  &  $n8b/n5b$ )
- L. Proportion on whom there is follow-up data on ART initiation, among those eligible (100% if universal treatment applies) by respective sub-group ( $n9a/n8a$  &  $n9b/n8b$ )
- M. Proportion initiating ART among those eligible (100% if universal treatment applies) with follow-up data, by sub-group ( $n10a/n9a$  &  $n10b/n9b$ )
- N. Proportion documented as retained on ART, by sub-group ( $n11a/n10a$ ,  $n11b/n10b$ ,  $n11c/n5c<sup>e</sup>$ )
- O. Proportion virally suppressed among those retained on ART, by sub-group ( $n12a/n11a$ ,  $n12b/n11b$ ,  $n12c/n11c$ )

a. Estimated or measured eg by census of target community    b. Not self-reporting as HIV-positive    c. This group could be further sub-divided into already in care (& not on ART) vs not already in care (& not on ART)  
 d. Retained = data confirming “on ART” in last 3 months    e. For those previously started on ART – denominator is n5c and time since ART was first initiated
